# Supplementary material
Source: MDPI journal article supplement (https://www.mdpi.com/2304-6740/12/1/23)
Supplement: s1 [file s1]

# Activity of Platinum-Based Cathode Electrocatalysts in Oxygen Redaction for Proton-Exchange Membrane Fuel Cells: Influence of the Ionomer Content

Anastasia Alekseenko <sup>1</sup>, Sergey Belenov <sup>1\*</sup>, Dmitriy Mauer <sup>1</sup>, Elizaveta Moguchikh <sup>1</sup>, Irina Falina <sup>2</sup>, Julia Bayan <sup>1</sup>, Ilya Pankov <sup>3</sup>, Danil Alekseenko <sup>1</sup>, Vladimir Guterman <sup>1</sup>

## Supporting Information

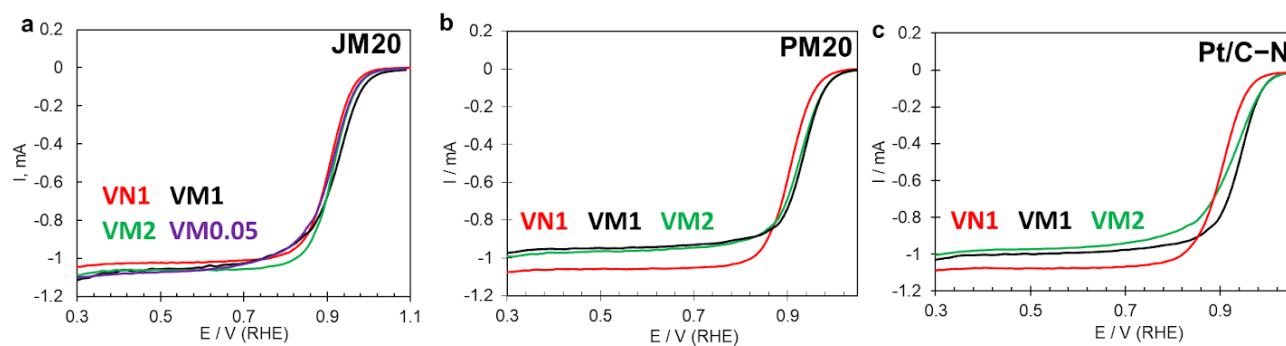

**Figure S1** LSV curves: JM20 (a), PM20 (b) and Pt/C-N (c). Rotation speed of RDE is 1600 rpm. 0.1 M HClO<sub>4</sub>.

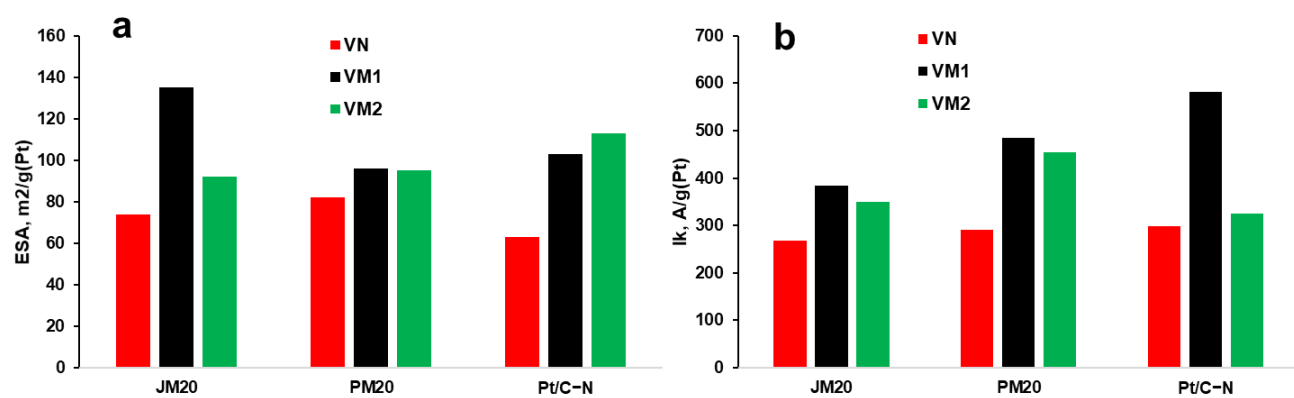

**Figure S2** Influence ionomer content to ESA value (a) and ORR activity (kinetic current) for different Pt-based catalysts: JM20, PM20 and Pt/C-N.
